# Supplementary material for: Arhgef2 regulates neural differentiation in the cerebral cortex through mRNA m6A-methylation of Npdc1 and Cend1
Source: PubMed Central journal article supplement — iScience. 2021 May 24;24(6):102645. doi: 10.1016/j.isci.2021.102645 (PMC8185223; doi:10.1016/j.isci.2021.102645), 2021-05-24
Supplement: mmc1.pdf [file mmc1.pdf]

**Supplemental information**

**Arhgef2 regulates neural differentiation in  
the cerebral cortex through mRNA  
m<sup>6</sup>A-methylation of Npdc1 and Cend1**

**Pei Zhou, Yifei Qi, Xiang Fang, Miaomiao Yang, Shuxin Zheng, Caihua Liao, Fengying Qin, Lili Liu, Hong Li, Yan Li, Ethiraj Ravindran, Chuanbo Sun, Xinshu Wei, Wen Wang, Liang Fang, Dingding Han, Changgeng Peng, Wei Chen, Na Li, Angela M. Kaindl, and Hao Hu**

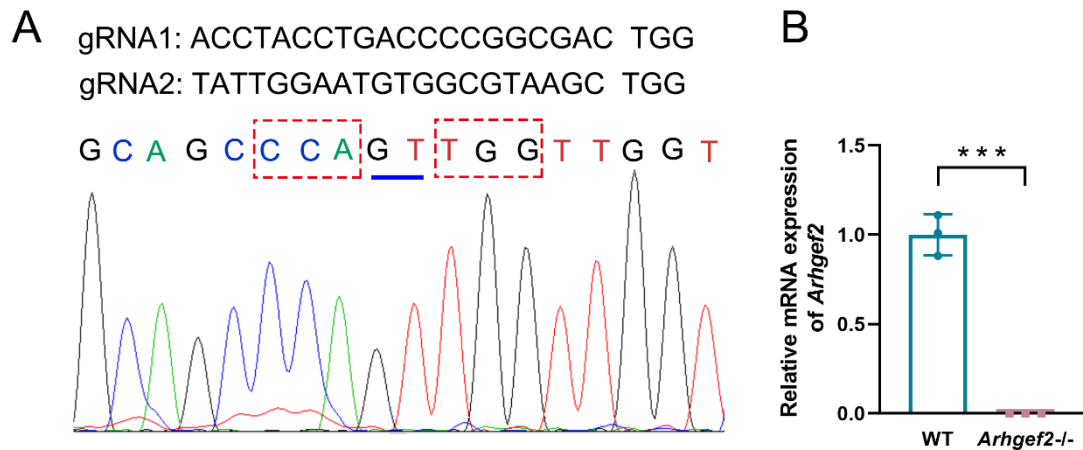

**Figure S1. CRISPR/Cas9-mediated Arhgef2 knockout in mice. Related to Figure 1.**

**(A)** Sanger-sequencing of genome editing locus in Arhgef2<sup>-/-</sup> mice (postnatal 6 weeks). The gRNA target site and PAM sequencing were labeled by blue and red, respectively. The most frequent editing event was deletion of 581 bp. **(B)** RT-qPCR quantification of Arhgef2 mRNA level in wildtype (WT) and Arhgef2<sup>-/-</sup> mice. ACTB is used as internal control. The data are shown as mean  $\pm$  S.D. n = 3, \*\*\* p < 0.001, unpaired t-test.

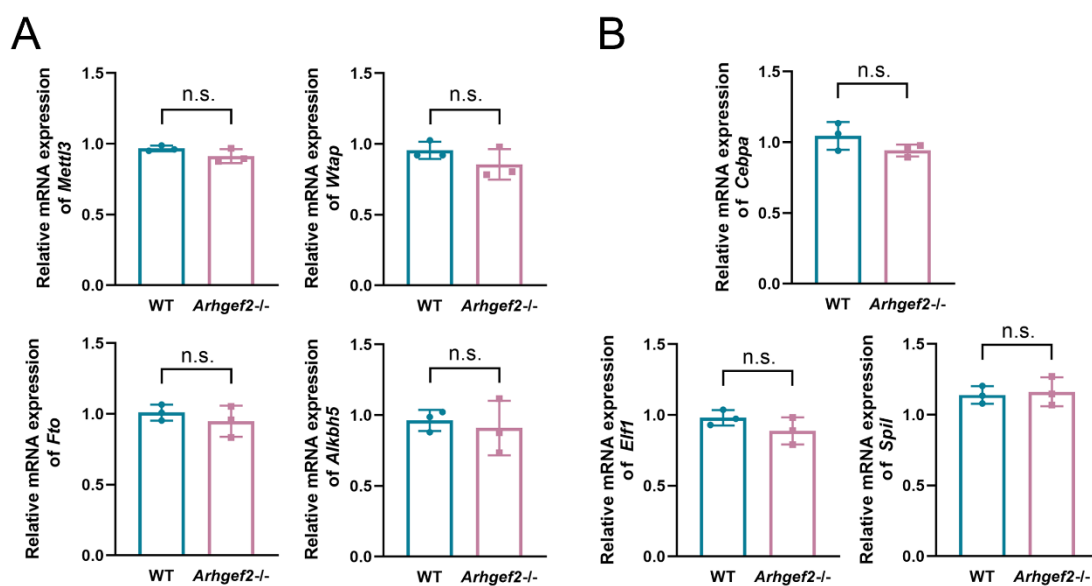

**Figure S2. RT-qPCR quantification of methylases, demethylases and transcription factors of Mettl14. Related to Figure 3. (A)** RT-qPCR quantification of methylases (Mettl3, Wtap) and demethylases (Fto, Alkbh5). Actb is used as internal control. **(B)** RT-qPCR quantification of transcription factors of Mettl14. The data are shown as mean  $\pm$  S.D. n = 3, n.s.: no significant difference, unpaired t-test.

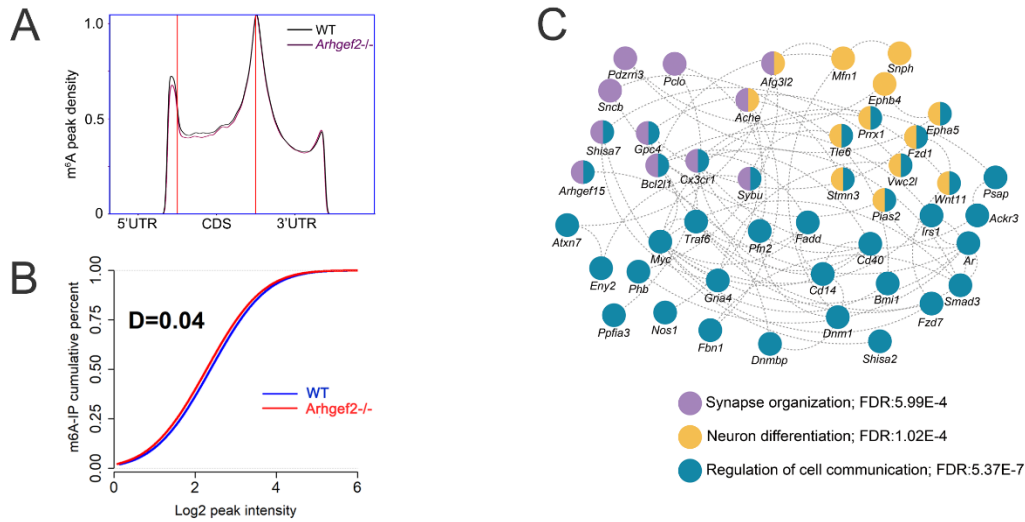

**Figure S3. m<sup>6</sup>A-seq analysis. Related to Figure 3.** (A) Density distribution of m<sup>6</sup>A peaks across mRNA transcripts. Regions of the 5' untranslated region (5'UTR), coding region (CDS), and 3' untranslated region (3'UTR) were split into 100 segments, and percentages of m<sup>6</sup>A peaks that fall within each segment were determined. (B) Cumulative distribution of log<sub>2</sub> (fold enrichment) for m<sup>6</sup>A-tagged genes in wild-type and *Arhgef2*<sup>-/-</sup> mice. D represents the value of Kolmogorov-Smirnov test statistic corresponding to the maximum difference between wild-type and *Arhgef2*<sup>-/-</sup> mice. (C) Protein-protein interaction network of m<sup>6</sup>A-tagged genes in GO enrichment related to cell communication, neuron differentiation and synapse organization. FDR represents false discovery rate.

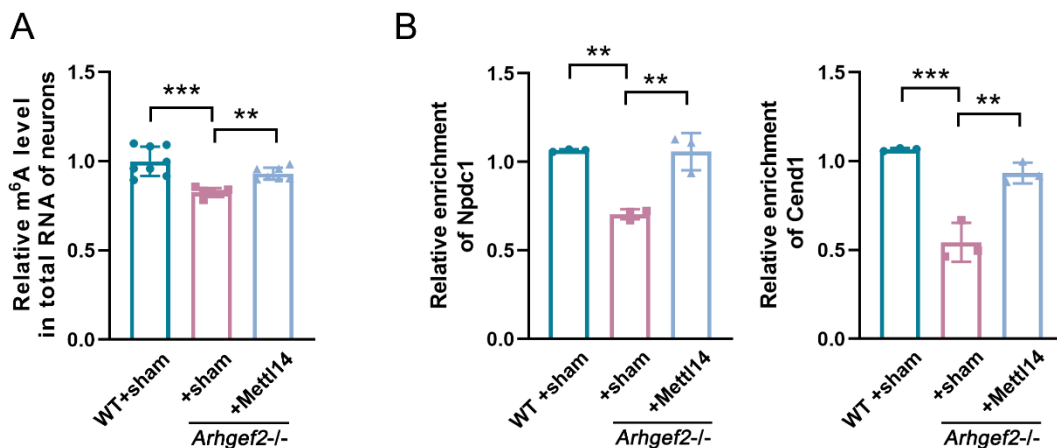

**Figure S4. Rescue effect of Mettl14. Related to Figure 5.** (A) Total m<sup>6</sup>A level of primary neurons was significantly increased with overexpression of Mettl14. n = 8, \*\*p < 0.01, \*\*\*p < 0.001, One-way ANOVA. (B) RNA immunoprecipitation (RIP) of m<sup>6</sup>A-modified *Npdc1* and *Cend1* mRNA, followed by quantification using qRT-PCR. n = 3, \*\*p < 0.01, \*\*\*p < 0.001, One-way ANOVA.

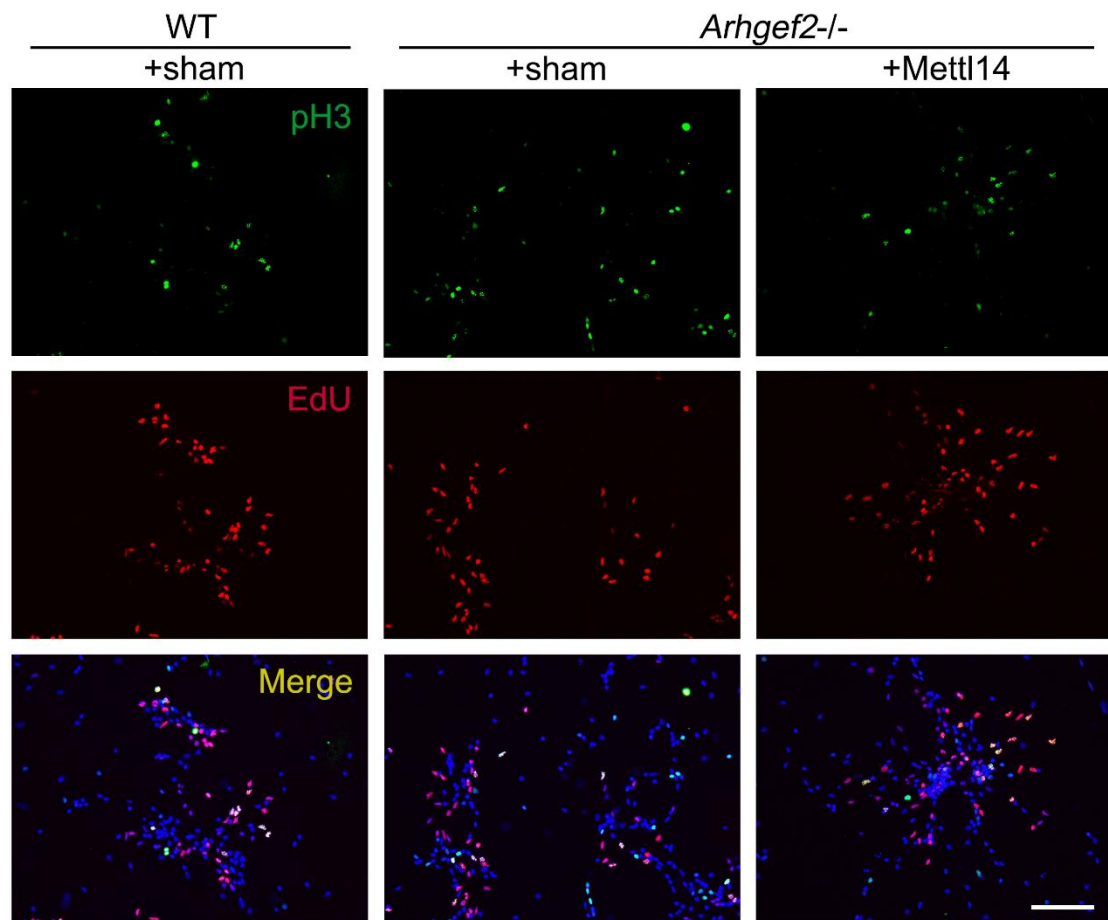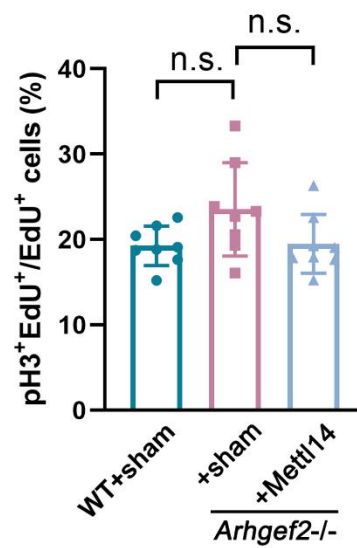

**Figure S5. Immunostaining of phospho-histone H3 (pH3) in primary neurons exposed to EdU for 6 h. Related to Figure 5.** pH3 (marker for cells entered M phase, green); EdU (incorporate into new DNA synthesis, red). Bar = 100  $\mu$ m. n = 4 (2 measurement for each group), n.s.: no significant difference, One-way ANOVA.

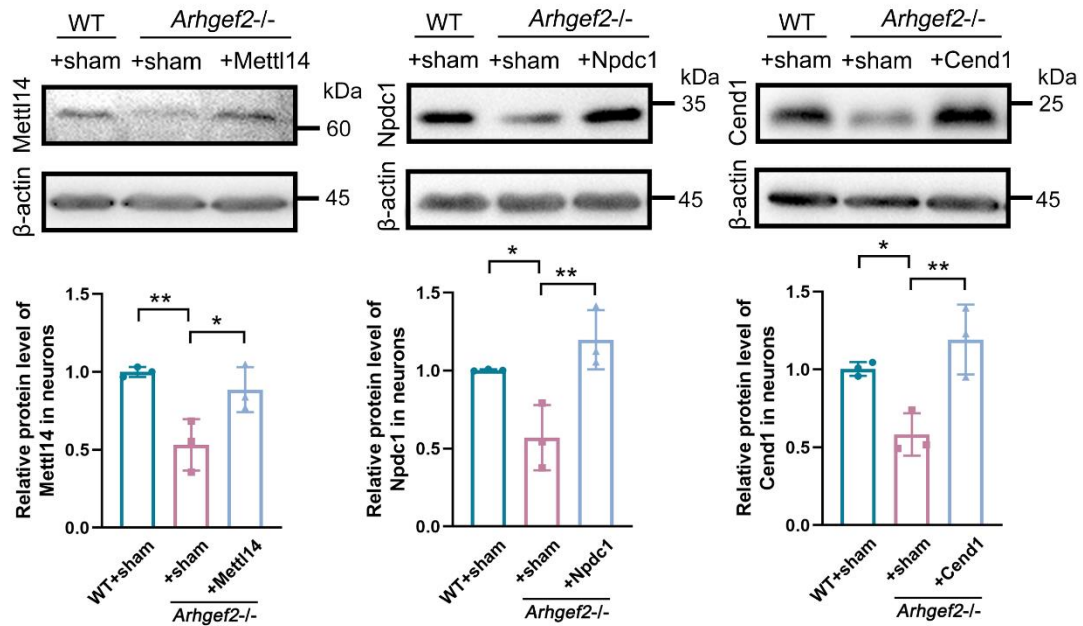

**Figure S6. Protein level of Mettl14, Npdc1 and Cend1. Related to Figure 5, 6, 7.** Protein expression of Mettl14, Npdc1 and Cend1 after overexpression in primary cells, respectively. n = 3, \*p < 0.05, \*\*p < 0.01, One-way ANOVA.

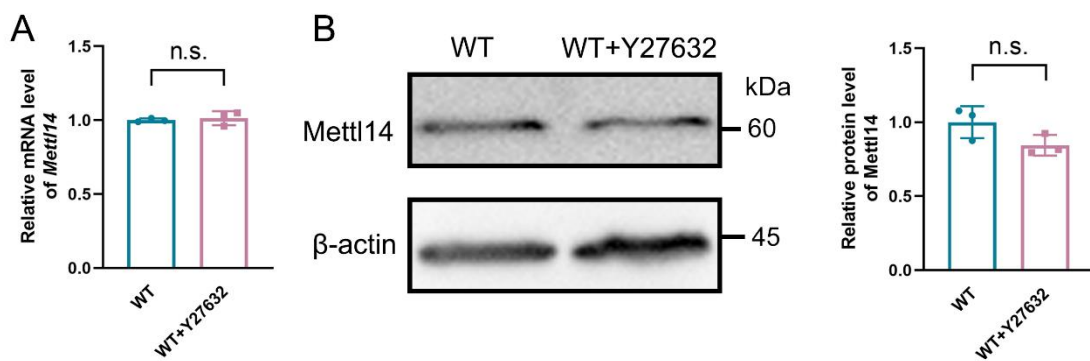

**Figure S7. The mRNA and protein expression of Mettl14 with treatment of Rock inhibitor (Y27632, 5 μM) in wild-type primary cells. Related to Figure 3.** (A) RT-qPCR quantification of *Mettl14* mRNA. n = 3, unpaired t-test. (B) Protein level of Mettl14 was detected by western blot. n = 3, n.s.: no significant difference, unpaired t-test.
